# Supplementary material
Source: PubMed Central journal article supplement (PMC5936834)
Supplement: supp_RA117.001329_134479_2_supp_66428_p3g45r.pdf [file supp_RA117.001329_134479_2_supp_66428_p3g45r.pdf]

# Extensive peptide and natural protein substrate screens reveal that mouse caspase-11 has much narrower substrate specificity than caspase-1

Monica L. Gonzalez Ramirez<sup>1,2\*</sup>, Marcin Poreba<sup>1,3\*</sup>, Scott J. Snipas<sup>1</sup>, Katarzyna Groborz<sup>3</sup>, Marcin Drag<sup>3</sup> and Guy S. Salvesen<sup>1†</sup>

<sup>1</sup>NCI-Designated Cancer Center and <sup>2</sup>Graduate School of Biomedical Sciences, Sanford Burnham Prebys Medical Discovery Institute, La Jolla, CA 92037, USA; <sup>3</sup>Department of Bioorganic Chemistry, Faculty of Chemistry, Wrocław University of Science and Technology, Wrocław, Poland

\*MLG and MP contributed equally to this work

Running Title – Inflammatory caspases

†Corresponding author: Guy S. Salvesen, Sanford Burnham Prebys Medical Discovery Institute, 10901 North Torrey Pines Road, La Jolla, CA 92037. Tel: 858-646-3114, email: [gsalvesen@sbp.edu](mailto:gsalvesen@sbp.edu)

## SUPPLEMENTARY INFORMATION

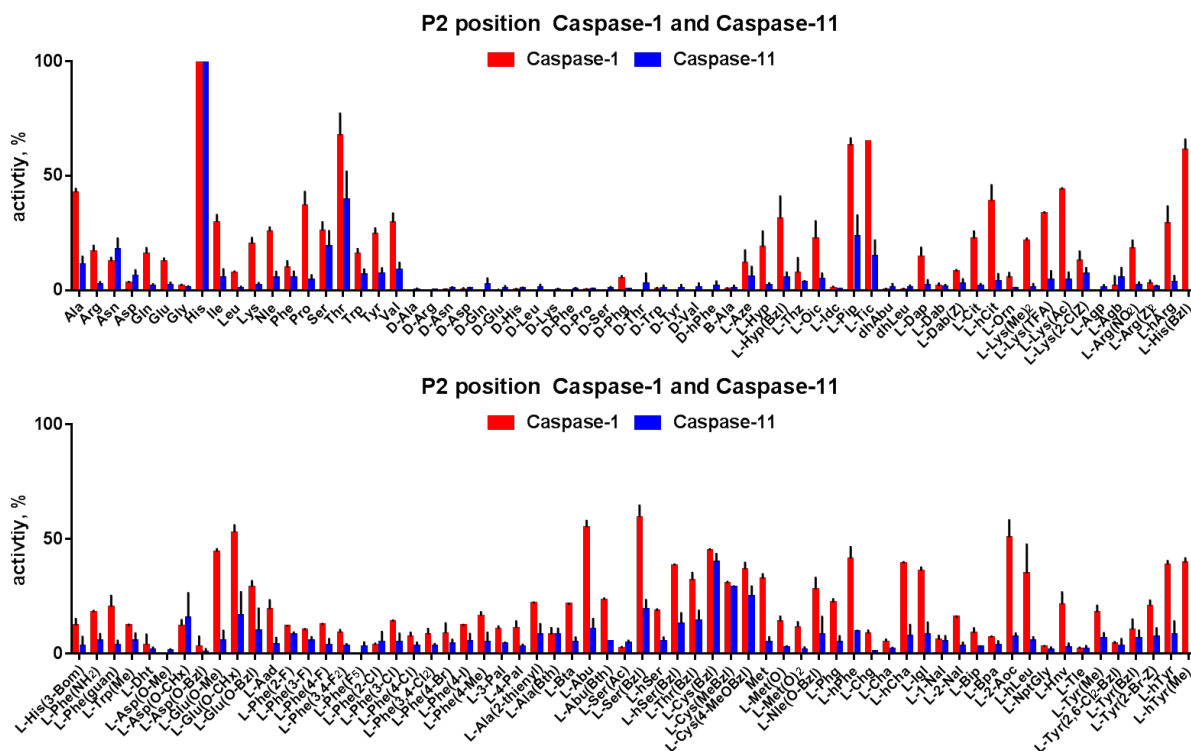

**Figure S1 Mouse Caspase-1 and Caspase-11 substrate specificity in the P<sub>2</sub> position determined using HyCoSuL.** Y axis shows relative activity, and x axis displays abbreviated natural and unnatural amino acids. Error bars represent standard deviations from three replicates (one biological replicate and two technical replicates).





| Substrate sequence<br>Ac-P <sub>4</sub> -P <sub>3</sub> -P <sub>2</sub> -P <sub>1</sub> -ACC | $k_{\text{cat}}/K_{\text{M}}, \text{M}^{-1}\text{s}^{-1}$ |            | Selectivity<br>factor |
|----------------------------------------------------------------------------------------------|-----------------------------------------------------------|------------|-----------------------|
|                                                                                              | Caspase-1                                                 | Caspase-11 |                       |
| WQPD Trp-Gln-Pro-Asp                                                                         | 257,000                                                   | < 50       | > 5,140               |
| FEAD Phe-Glu-Ala-Asp                                                                         | 171,000                                                   | < 50       | > 3,420               |
| YQPD Tyr-Gln-Pro-Asp                                                                         | 148,000                                                   | < 50       | > 2,960               |
| WTPD Trp-Thr-Pro-Asp                                                                         | 138,000                                                   | < 50       | > 2,760               |
| YEKD Tyr-Glu-Lys-Asp                                                                         | 106,000                                                   | < 50       | > 2,120               |
| WQVD Trp-Gln-Val-Asp                                                                         | 328,000                                                   | 244        | 1,344                 |
| YTID Tyr-Thr-Ile-Asp                                                                         | 67,000                                                    | < 50       | > 1,340               |
| WKQD Trp-Lys-Gln-Asp                                                                         | 46,200                                                    | < 50       | > 924                 |
| YKAD Tyr-Lys-Ala-Asp                                                                         | 38,400                                                    | < 50       | > 768                 |
| YVHD Tyr-Val-His-Asp                                                                         | 207,000                                                   | 415        | 499                   |
| YKMD Tyr-Lys-Met-Asp                                                                         | 29,200                                                    | 152        | 192                   |
| FLTD Phe-Leu-Thr-Asp                                                                         | 141,000                                                   | 829        | 170                   |
| LESD Leu-Glu-Ser-Asp                                                                         | 78,800                                                    | 534        | 147                   |
| WEHD Trp-Glu-His-Asp                                                                         | 522,000                                                   | 4,100      | 127                   |
| LEHD Leu-Glu-His-Asp                                                                         | 179,000                                                   | 3,850      | 47                    |
| VWHD Val-Trp-His-Asp                                                                         | 31,500                                                    | 4,600      | 6.9                   |
| VAHD Val-Asp-His-Asp                                                                         | 29,500                                                    | 4,890      | 6.0                   |
| PYHD Pro-Tyr-His-Asp                                                                         | 22,400                                                    | 7,070      | 3.2                   |
| TWHD Thr-Trp-His-Asp                                                                         | 5,030                                                     | 1,620      | 3.1                   |
| PMHD Pro-Met-His-Asp                                                                         | 16,100                                                    | 7,200      | 2.2                   |

**Table S1 Kinetic parameters ( $k_{\text{cat}}/K_{\text{M}}$ ) of ACC-substrates with natural amino acids measured toward mouse caspase-1 and caspase-11.** Substrates were sorted by a decreasing selectivity factor, which was calculated by dividing  $k_{\text{cat}}/K_{\text{M}}$ (Caspase-1) by  $k_{\text{cat}}/K_{\text{M}}$ (Caspase-11). Each experiment was repeated at least three times, and the  $k_{\text{cat}}/K_{\text{M}}$  values are presented as an average. Standard deviations were below 15%.

| Substrate sequence<br>Ac-P <sub>4</sub> -P <sub>3</sub> -P <sub>2</sub> -P <sub>1</sub> -ACC | $k_{cat}/K_M, M^{-1}s^{-1}$ |            | Selectivity<br>factor |
|----------------------------------------------------------------------------------------------|-----------------------------|------------|-----------------------|
|                                                                                              | Caspase-1                   | Caspase-11 |                       |
| Trp(Me)-Glu-hLeu-Asp                                                                         | 212,000                     | 165        | 1,280                 |
| Tyr-Val-Lys(tfa)-Asp                                                                         | 52,200                      | 52         | 1,000                 |
| Cha-Glu-Tic-Asp                                                                              | 544,000                     | 609        | 893                   |
| Trp(Me)-Gln-Tic-Asp                                                                          | 455,000                     | 621        | 732                   |
| Trp(Me)-Glu(Me)-hCit-Asp                                                                     | 212,000                     | 348        | 609                   |
| Phe(2Cl)-Glu-Tic-Asp                                                                         | 525,000                     | 1,010      | 519                   |
| Trp-Tle-His-Asp                                                                              | 316,000                     | 635        | 498                   |
| Trp(Me)-Dab-Pip-Asp                                                                          | 23,300                      | 52         | 448                   |
| 1Nal-Gln-Abu-Asp                                                                             | 226,000                     | 510        | 443                   |
| Tyr-Gln-2Aoc-Asp                                                                             | 21,800                      | 52         | 419                   |
| Phe(2Cl)-Lys(ac)-His-Asp                                                                     | 139,000                     | 52         | 267                   |
| Tyr(Me)-Gln-Thr-Asp                                                                          | 118,000                     | 568        | 208                   |
| Phe(2Cl)-Glu-Pip-Asp                                                                         | 388,000                     | 2,420      | 160                   |
| Trp-Thr(Bzl)-His-Asp                                                                         | 488,000                     | 3,370      | 145                   |
| Phe(2Cl)-Met(O2)-Pip-Asp                                                                     | 321,000                     | 2,270      | 141                   |
| Cha-Glu-His-Asp                                                                              | 289,000                     | 2,300      | 126                   |
| Tle-Phg-His-Asp                                                                              | 6,000                       | 52         | 115                   |
| Cha-Glu-His-Asp                                                                              | 295,000                     | 2,580      | 114                   |
| Trp(Me)-Glu-His(Bzl)-Asp                                                                     | 524,000                     | 4,900      | 107                   |
| Tyr-Phe(F5)-His-Asp                                                                          | 229,000                     | 2,200      | 104                   |
| Tyr-Thr(Bzl)-His-Asp                                                                         | 99,800                      | 1,180      | 85                    |
| Trp-Met(O2)-His-Asp                                                                          | 512,000                     | 7,140      | 72                    |
| 2Nal-Thr-His-Asp                                                                             | 99,800                      | 1,580      | 63                    |
| Phe(Me)-Met(O2)-His-Asp                                                                      | 275,000                     | 5,740      | 48                    |
| Val-Hyp(Bzl)-His-Asp                                                                         | 2,470                       | 52         | 48                    |
| Val-hGlu-Thr(Bzl)-Asp                                                                        | 34,500                      | 1,030      | 34                    |
| Tyr-Tyr(2,6Cl2Bzl)-His-Asp                                                                   | 19,000                      | 1,010      | 19                    |
| Glu(Ochx)-Bip-His(Bzl)-Asp                                                                   | 745                         | 52         | 14                    |
| Tle-hGlu-Thr(Bzl)-Asp                                                                        | 34,000                      | 2,580      | 13                    |
| Tle-Met-His-Asp                                                                              | 163,000                     | 22,800     | 7.2                   |
| Tle-Phe(2Cl)-His-Asp                                                                         | 149,000                     | 61,600     | 2.4                   |
| Val-Tyr(Bzl)-His-Asp                                                                         | 35,400                      | 16,600     | 2.1                   |
| Val-Tyr(2,6Cl2Bzl)-His-Asp                                                                   | 8,860                       | 4,550      | 2.0                   |
| Tle-Phe(4-Cl)-His-Asp                                                                        | 81,000                      | 59,000     | 1.3                   |
| Val-Bip-His-Asp                                                                              | 13,000                      | 15,000     | 0.87                  |
| Tle-Bpa-His(Bzl)-Asp                                                                         | 89,000                      | 112,000    | 0.80                  |
| Tle-Bip-His-Asp                                                                              | 80,200                      | 109,000    | 0.74                  |
| Pro-Bip-His(Bzl)-Asp                                                                         | 25,900                      | 69,000     | 0.38                  |

**Table S2 Kinetic parameters ( $k_{cat}/K_M$ ) of ACC-substrates with natural and unnatural amino acids measured toward mouse caspase-1 and caspase-11.** Substrates were sorted by a decreasing selectivity factor, which was calculated by dividing  $k_{cat}/K_M$ (Caspase-1) by  $k_{cat}/K_M$ (Caspase-11). Each experiment was repeated at least three times, and the  $k_{cat}/K_M$  values are presented as an average. Standard deviations were below 15%.

| Substrate sequence:<br>Ac-P4-P3-P2-P1-<br>ACC |      | $k_{cat}/K_M, M^{-1}s^{-1}$ |            |                |           |           |           |           |           |           |
|-----------------------------------------------|------|-----------------------------|------------|----------------|-----------|-----------|-----------|-----------|-----------|-----------|
|                                               |      | Mouse caspases              |            | Human caspases |           |           |           |           |           |           |
|                                               |      | Caspase-1                   | Caspase-11 | Caspase-1      | Caspase-4 | Caspase-5 | Caspase-3 | Caspase-7 | Caspase-8 | Caspase-9 |
| reference                                     | WEHD | 522,000                     | 4,100      | 554,000        | 18,000    | 26,800    | 8,970     | 413       | 14,900    | 8,470     |
|                                               | LEHD | 179,000                     | 3,850      | 97,500         | 8,950     | 21,500    | 9,670     | 730       | 18,600    | 12,700    |
| Mouse caspase-1 preferred                     | WQPD | 257,000                     | <50        | 124,000        | 3,470     | 5,420     | 1,410     | 71        | 2,480     | 192       |
|                                               | FEAD | 171,000                     | <50        | 57,100         | 1,870     | 6,720     | 1,540     | 182       | 3,890     | 526       |
|                                               | WQVD | 328,000                     | 244        | 125,000        | 4,290     | 5,090     | 12,100    | 1,300     | 3,870     | 217       |
| Mouse caspase-11 preferred                    | PYHD | 22,400                      | 7,070      | 10,900         | 327       | 1,110     | 2,100     | 88        | 4,490     | 11,000    |
|                                               | PMHD | 16,100                      | 7,200      | 13,200         | 463       | 129       | 3,160     | 95        | 3,570     | 12,900    |

**Table S3 Kinetic parameters ( $k_{cat}/K_M$ ) of ACC-substrates with natural amino acids measured toward mouse caspase-1 and caspase-11.** Based on screening of a natural amino acid HyCoSuL library, single substrates were synthesized focusing on mouse caspase-1 and caspase-11 hits. Each substrate was assayed with either mouse caspase-1 or caspase-11, or the indicated human caspases. All synthesized natural amino acid substrates were preferred by caspase-1, even those that had the highest catalytic numbers for caspase-11. Each experiment was repeated at least three times, and the  $k_{cat}/K_M$  values are presented as an average. Standard deviations were below 15%.

| Substrate sequence:<br>Ac-P4-P3-P2-P1-ACC |                                  | $k_{cat}/K_M, M^{-1}s^{-1}$ |            |                |           |           |           |           |           |           |
|-------------------------------------------|----------------------------------|-----------------------------|------------|----------------|-----------|-----------|-----------|-----------|-----------|-----------|
|                                           |                                  | Mouse caspases              |            | Human caspases |           |           |           |           |           |           |
|                                           |                                  | Caspase-1                   | Caspase-11 | Caspase-1      | Caspase-4 | Caspase-5 | Caspase-3 | Caspase-7 | Caspase-8 | Caspase-9 |
| Mouse caspase-1 preferred                 | Cha-Glu-Tic-Asp                  | 544,000                     | 609        | 159,000        | 37,900    | 28,900    | 10,500    | 953       | 7,860     | 7,760     |
|                                           | Phe(2Cl)-Glu-Tic-Asp             | 525,000                     | 1,010      | 244,000        | 15,200    | 16,800    | 75,900    | 10,100    | 14,200    | 5,400     |
|                                           | Trp(Me)-Glu-His(Bzl)-Asp         | 524,000                     | 1,700      | 624,000        | 15,800    | 20,100    | 6,300     | 278       | 7,620     | 6,670     |
|                                           | Trp-Met(O <sub>2</sub> )-His-Asp | 512,000                     | 7,140      | 548,000        | 9,600     | 15,400    | 5,000     | 60        | 2,400     | 6,700     |
| Mouse caspase-11 preferred                | Tle-Bpa-His(Bzl)-Asp             | 89,000                      | 112,000    | 25,200         | 4,400     | 2,650     | 23,300    | 100       | 6,400     | 4,200     |
|                                           | Tle-Bip-His-Asp                  | 80,200                      | 109,000    | 10,800         | 2,800     | 5,280     | 16,900    | 163       | 11,700    | 8,400     |
|                                           | Pro-Bip-His(Bzl)-Asp             | 25,900                      | 69,000     | 13,800         | 590       | 314       | 1,260     | 41        | 2,750     | 6,990     |

**Table S4 Kinetic parameters ( $k_{cat}/K_M$ ) of ACC-substrates with natural amino acids measured toward mouse caspase-1 and caspase-11.** Based on screening of an unnatural amino acid HyCoSuL library, single substrates were synthesized focusing on mouse caspase-1 and caspase-11 hits. Each substrate was assayed with either mouse caspase-1 or caspase-11, or the indicated human caspases. All synthesized natural amino acid substrates were preferred by caspase-1, even those that had the highest catalytic numbers for caspase-11. Each experiment was repeated at least three times, and the  $k_{cat}/K_M$  values are presented as an average. Standard deviations were below 15%.

| fluorogenic substrate                             | [m/z + H] <sup>+</sup> calc.     | [m/z + H] <sup>+</sup> measured  |
|---------------------------------------------------|----------------------------------|----------------------------------|
| Substrates with natural amino acids               |                                  |                                  |
| Ac-Leu-Glu-His-Asp-ACC                            | 755.2995                         | 755.2998                         |
| Ac-Trp-Glu-His-Asp-ACC                            | 828.2947                         | 828.2958                         |
| Ac-Phe-Leu-Thr-Asp-ACC                            | 759.2966 (with Na <sup>+</sup> ) | 759.2957 (with Na <sup>+</sup> ) |
| Ac-Tyr-Val-His-Asp-ACC                            | 775.3046                         | 775.3040                         |
| Ac-Phe-Glu-Ala-Asp-ACC                            | 723.2620                         | 723.2638                         |
| Ac-Leu-Glu-Ser-Asp-ACC                            | 705.2726                         | 705.2736                         |
| Ac-Tyr-Gln-Pro-Asp-ACC                            | 764.2886                         | 764.2653                         |
| Ac-Tyr-Lys-Ala-Asp-ACC                            | 738.3093                         | 738.3094                         |
| Ac-Trp-Gln-Val-Asp-ACC                            | 789.3202                         | 789.3213                         |
| Ac-Trp-Thr-Pro-Asp-ACC                            | 760.2937                         | 760.2942                         |
| Ac-Tyr-Thr-Ile-Asp-ACC                            | 753.3090                         | 753.3113                         |
| Ac-Tyr-Glu-Lys-Asp-ACC                            | 796.3148                         | 796.3146                         |
| Ac-Trp-Lys-Gln-Asp-ACC                            | 818.3468                         | 818.3476                         |
| Ac-Trp-Gln-Pro-Asp-ACC                            | 787.3046                         | 787.3046                         |
| Ac-Tyr-Lys-Met-Asp-ACC                            | 798.3127                         | 798.3141                         |
| Ac-Thr-Trp-His-Asp-ACC                            | 800.2998                         | 800.3013                         |
| Ac-Val-Trp-His-Asp-ACC                            | 798.3206                         | 798.3236                         |
| Ac-Pro-Tyr-His-Asp-ACC                            | 773.2889                         | 773.2880                         |
| Ac-Val-Asp-His-Asp-ACC                            | 727.2682                         | 727.2677                         |
| Ac-Pro-Met-His-Asp-ACC                            | 741.2661                         | 741.2664                         |
| Substrates with natural and unnatural amino acids |                                  |                                  |
| Ac-Tyr(Me)-Gln-Thr-Asp-ACC                        | 782.2992                         | 782.3013                         |
| Ac-2Nal-Thr-His-Asp-ACC                           | 811.3046                         | 811.3060                         |
| Ac-Phe(Me)-Met(O <sub>2</sub> )-His-Asp-ACC       | 837.2872                         | 837.2888                         |
| Ac-Tyr-Thr(Bzl)-His-Asp-ACC                       | 867.3308                         | 867.3317                         |
| Ac-Tyr-Phe(F <sub>5</sub> )-His-Asp-ACC           | 913.2575                         | 913.2579                         |
| Ac-Trp-Met(O <sub>2</sub> )-His-Asp-ACC           | 862.2824                         | 862.2839                         |
| Ac-Trp-Thr(Bzl)-His-Asp-ACC                       | 890.3468                         | 890.3487                         |
| Ac-Cha-Glu-Tic-Asp-ACC                            | 817.3403                         | 817.3427                         |
| Ac-Cha-Glu-His-Asp-ACC                            | 795.3308                         | 795.3336                         |
| Ac-Trp-Tle-His-Asp-ACC                            | 812.3362                         | 812.3362                         |
| Ac-Trp(Me)-Glu-His(Bzl)-Asp-ACC                   | 932.3573                         | 932.3574                         |
| Ac-Phe(2Cl)-Glu-Tic-Asp-ACC                       | 845.2544                         | 845.2551                         |
| Ac-Val-Glu-Thr(Bzl)-Asp-ACC                       | 795.3196                         | 795.3202                         |
| Ac-Tle-Glu-Thr(Bzl)-Asp-ACC                       | 809.3352                         | 809.3356                         |
| Ac-Phe(2Cl)-Met(O <sub>2</sub> )-Pip-Asp-ACC      | 831.2421                         | 831.2431                         |
| Ac-Trp(Me)-Gln-Tic-Asp-ACC                        | 863.3359                         | 863.3361                         |
| Ac-Phe(2Cl)-Glu-Pip-Asp-ACC                       | 797.2544                         | 797.2551                         |
| Ac-Trp(Me)-Glu(Me)-hCit-Asp-ACC                   | 890.3679                         | 890.3671                         |
| Ac-Tyr-Gln-2-Aoc-Asp-ACC                          | 808.3512                         | 808.3495                         |
| Ac-Tyr-Val-Lys(TFA)-Asp-ACC                       | 862.3229                         | 862.3230                         |
| Ac-Trp(Me)-Glu-hLeu-Asp-ACC                       | 832.3512                         | 832.3523                         |

|                                  |           |           |
|----------------------------------|-----------|-----------|
| Ac-Phe(2Cl)-Lys(Ac)-His-Asp-ACC  | 864.3078  | 864.3097  |
| Ac-Trp(Me)-Dab-Pip-Asp-ACC       | 787.3410  | 787.3382  |
| Ac-1Nal-Gln-Abu-Asp-ACC          | 786.3093  | 786.3090  |
| Ac-Val-Bip-His-Asp-ACC           | 835.3410  | 835.3412  |
| Ac-Tle-Met-His-Asp-ACC           | 757.2974  | 757.2979  |
| Ac-Tle-Phe(2Cl)-His-Asp-ACC      | 807.2863  | 807.2892  |
| Ac-Tyr-Tyr(2,6ClBzl)-His-Asp-ACC | 997.2685  | 997.2703  |
| Ac-Val-Tyr(Bzl)-His-Asp-ACC      | 865.3515  | 865.3509  |
| Ac-Val-Tyr(2,6ClBzl)-His-Asp-ACC | 933.2736  | 933.2735  |
| Ac-Tle-Bip-His-Asp-ACC           | 849.3566  | 849.3562  |
| Ac-Tle-Bpa-His(Bzl)-Asp-ACC      | 967.3985  | 967.3997  |
| Ac-Pro-Bip-His(Bzl)-Asp-ACC      | 923.3723  | 923.3732  |
| Ac-Val-Hyp(Bzl)-His-Asp-ACC      | 815.3367  | 815.3359  |
| Ac-Glu(Chx)-Bip-His(Bzl)-Asp-ACC | 1037.4403 | 1037.4426 |
| Ac-Tle-Phg-His-Asp-ACC           | 759.3097  | 759.3102  |
| Ac-Tle-Phe(4Cl)-His-Asp-ACC      | 807.2863  | 807.2868  |

**Table S5 High Resolution – Mass Spectrometry analysis of ACC-substrates.**



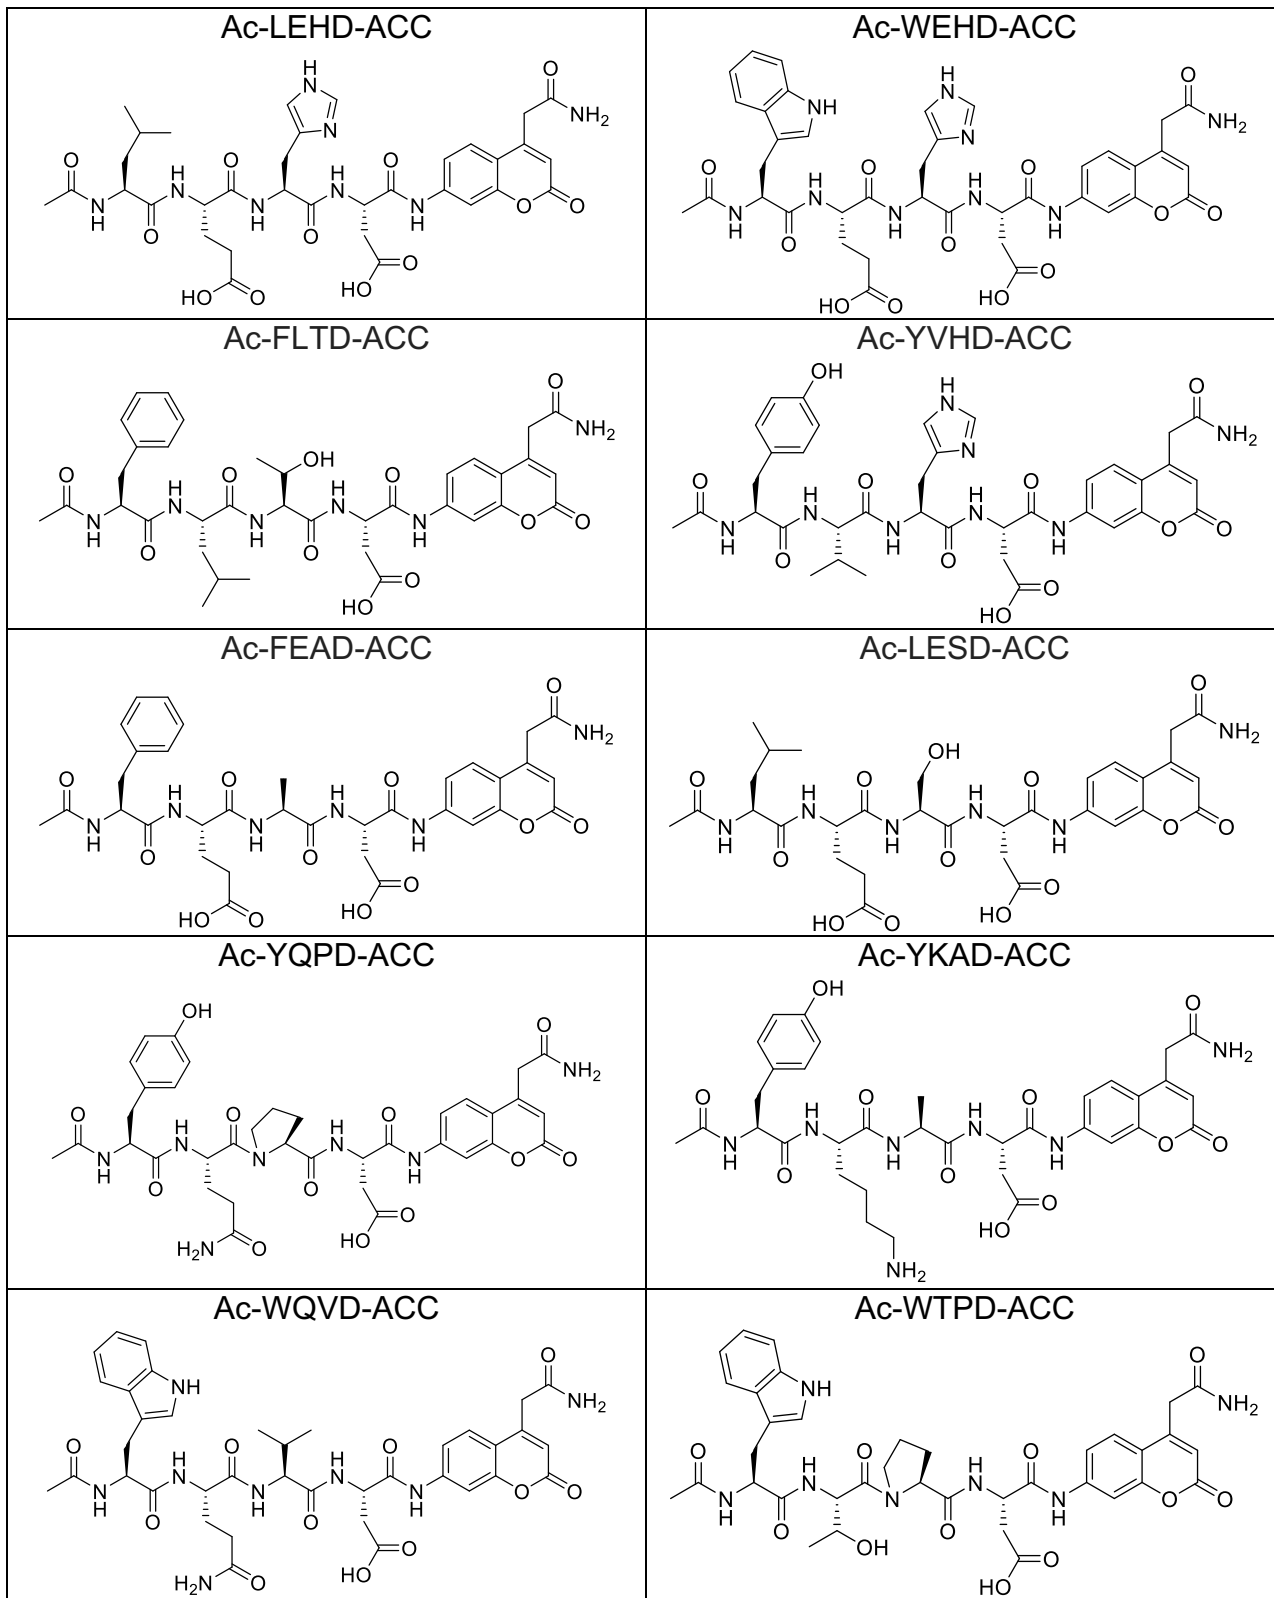

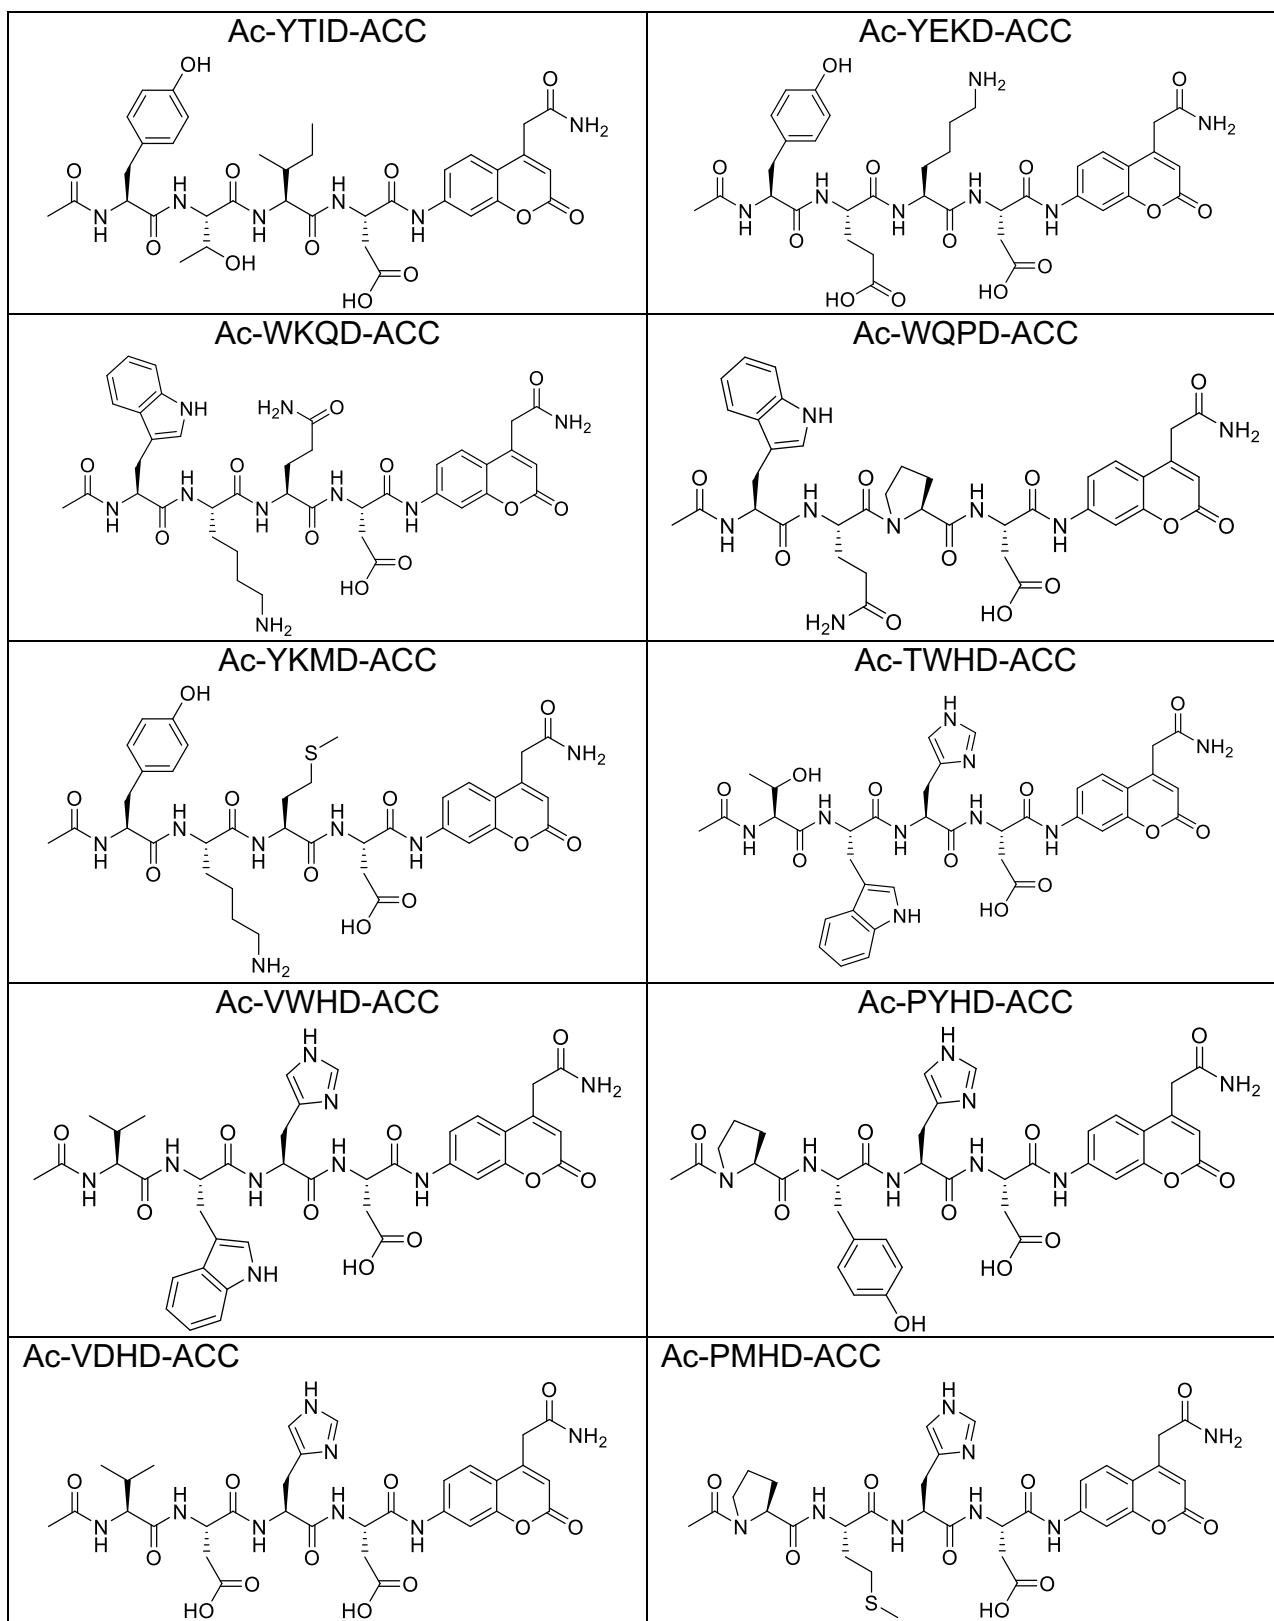

**Table S4 Structures of ACC-substrate with natural amino acids.**

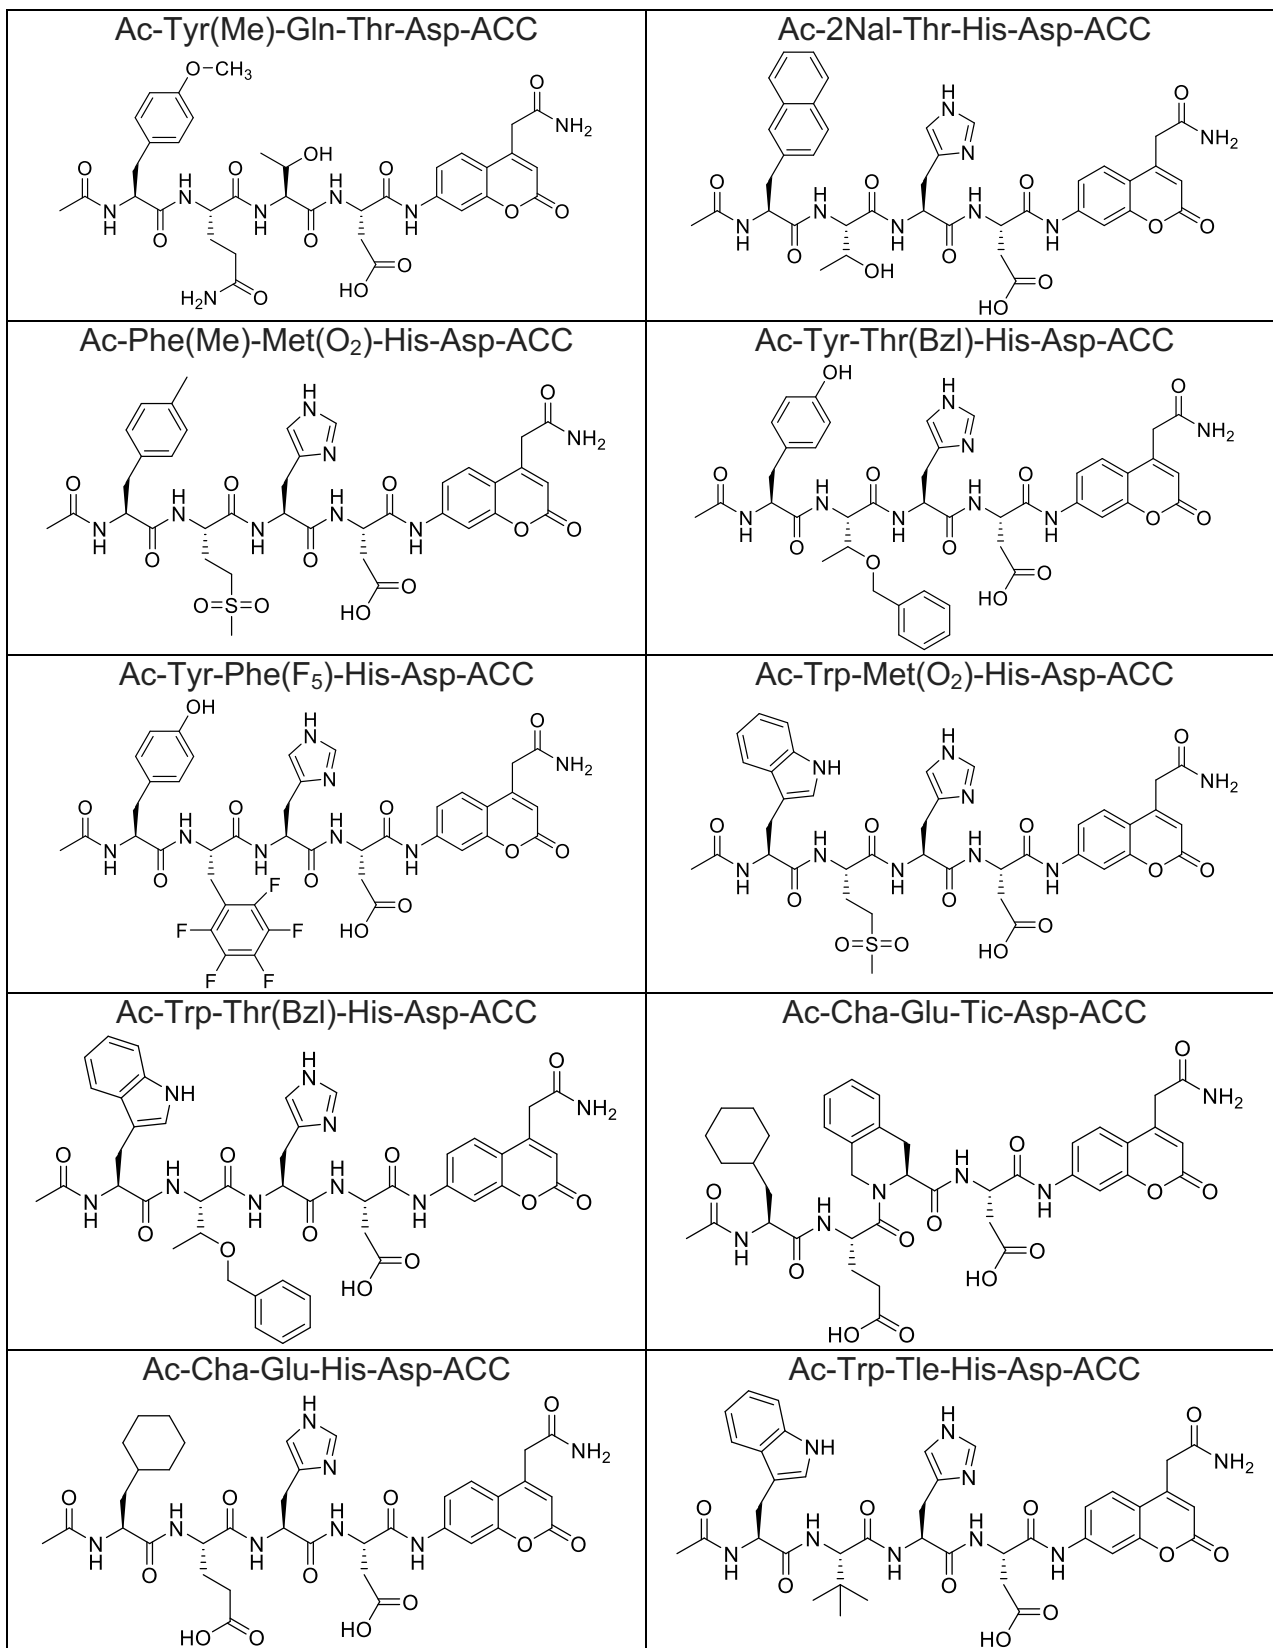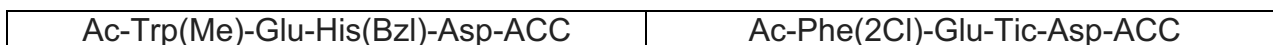

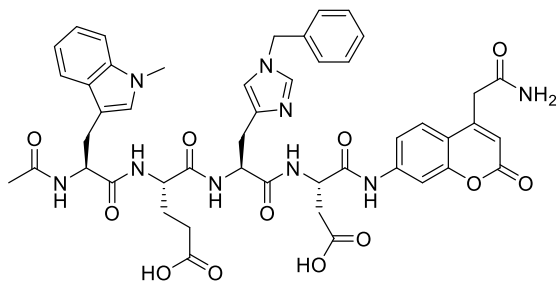

Ac-Val-Glu-Thr(Bzl)-Asp-ACC

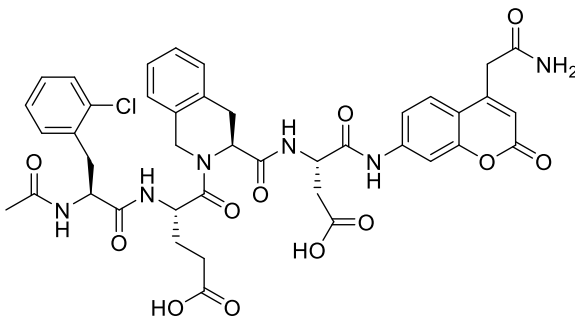

Ac-Tle-Glu-Thr(Bzl)-Asp-ACC

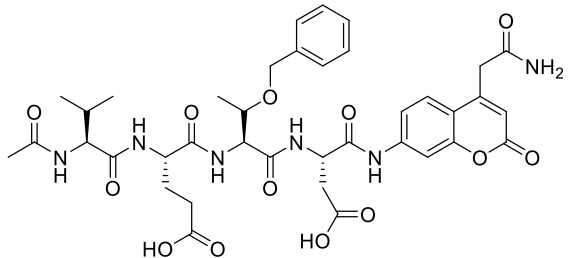

Ac-Phe(2Cl)-Met(O<sub>2</sub>)-Pip-Asp-ACC

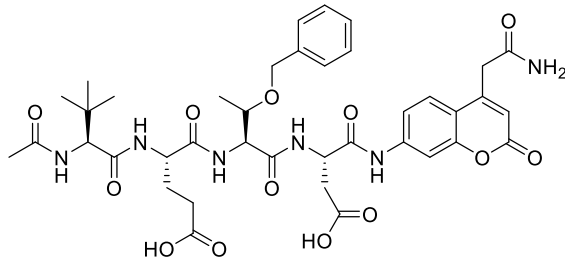

Ac-Trp(Me)-Gln-Tic-Asp-ACC

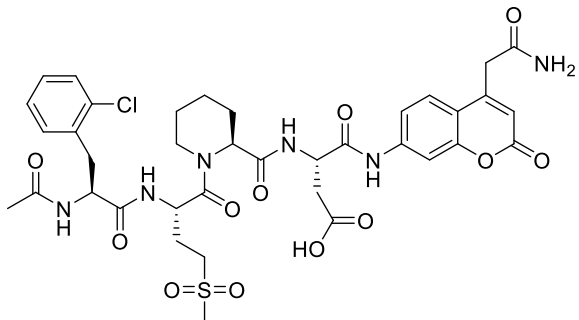

Ac-Phe(2Cl)-Glu-Pip-Asp-ACC

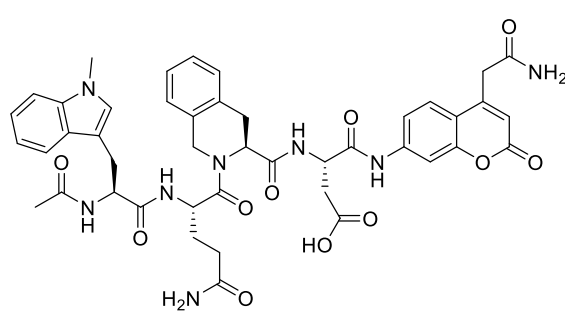

Ac-Trp(Me)-Glu(Me)-hCit-Asp-ACC

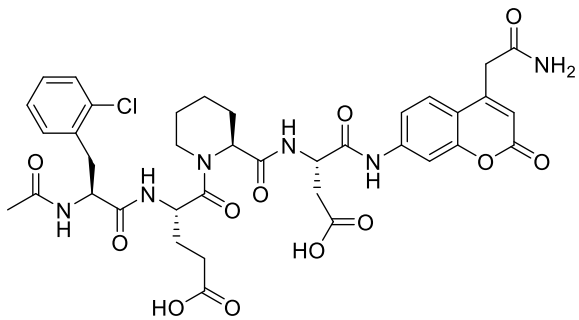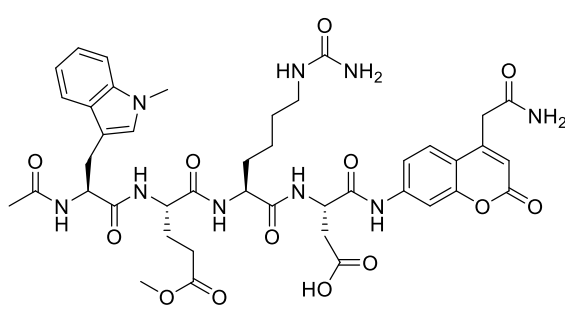

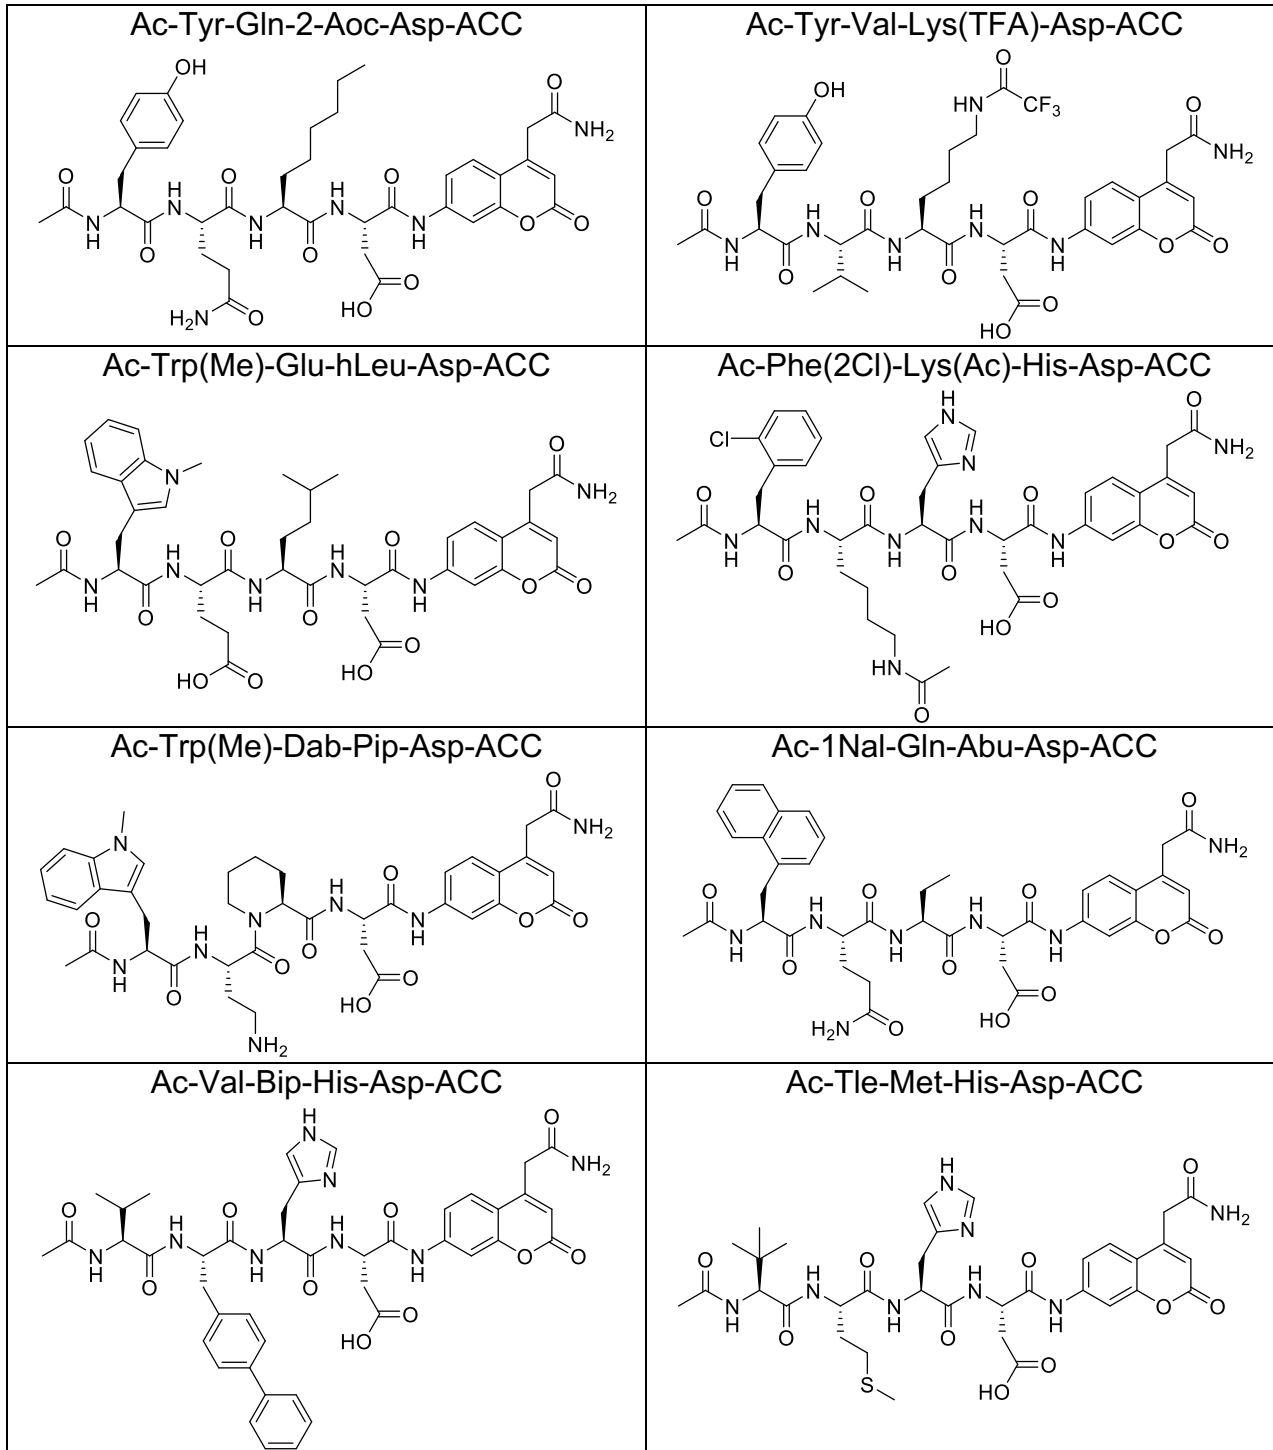

Ac-Tle-Phe(2-Cl)-His-Asp-ACC

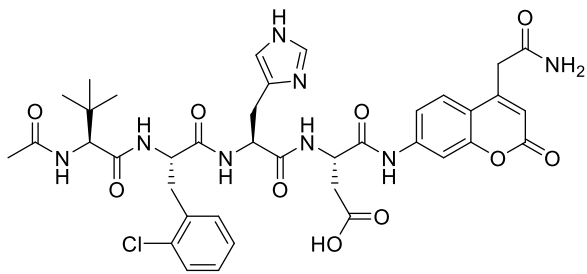

Ac-Tyr-Tyr(2,6ClBzl)-His-Asp-ACC

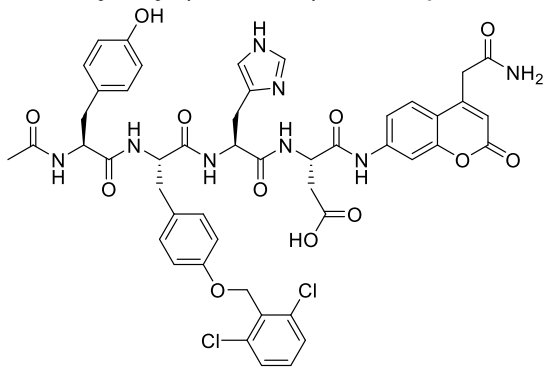

Ac-Val-Tyr(Bzl)-His-Asp-ACC

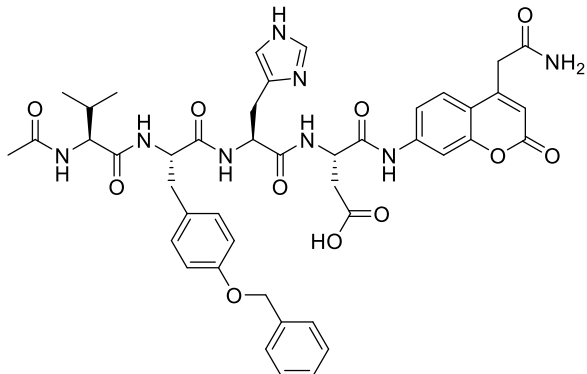

Ac-Val-Tyr(2,6ClBzl)-His-Asp-ACC

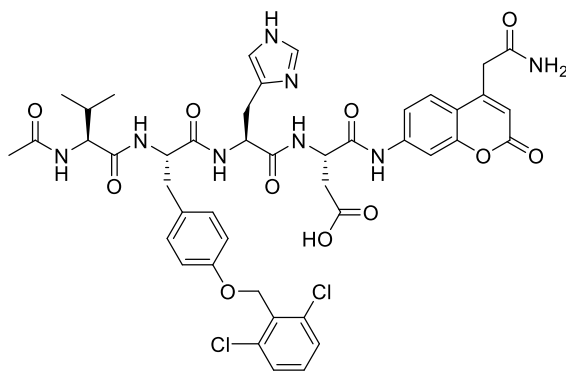

Ac-Tle-Bip-His-Asp-ACC

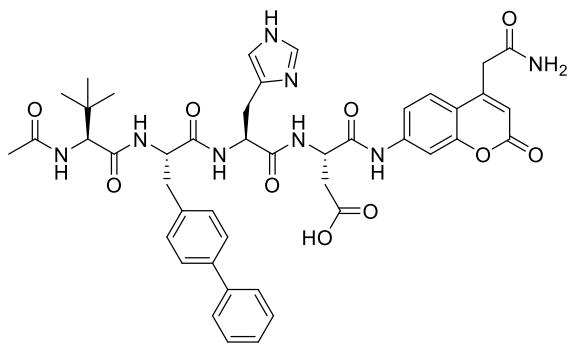

Ac-Tle-Bpa-His(Bzl)-Asp-ACC

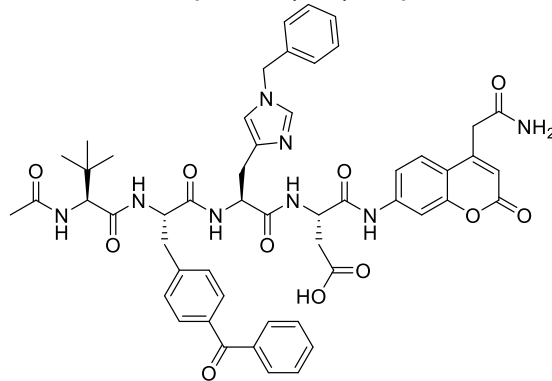

Ac-Pro-Bip-His(Bzl)-Asp-ACC

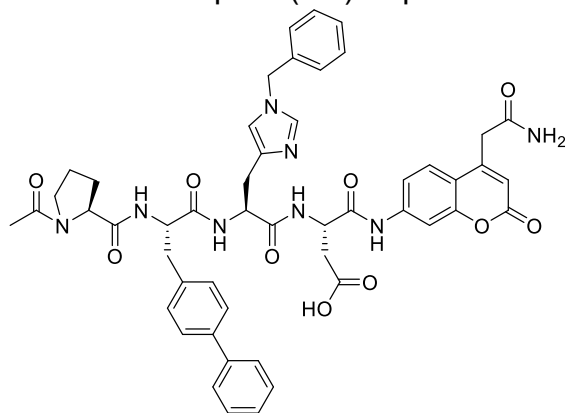

Ac-Val-Hyp(Bzl)-His-Asp-ACC

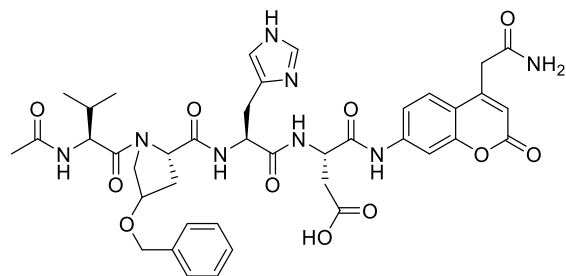

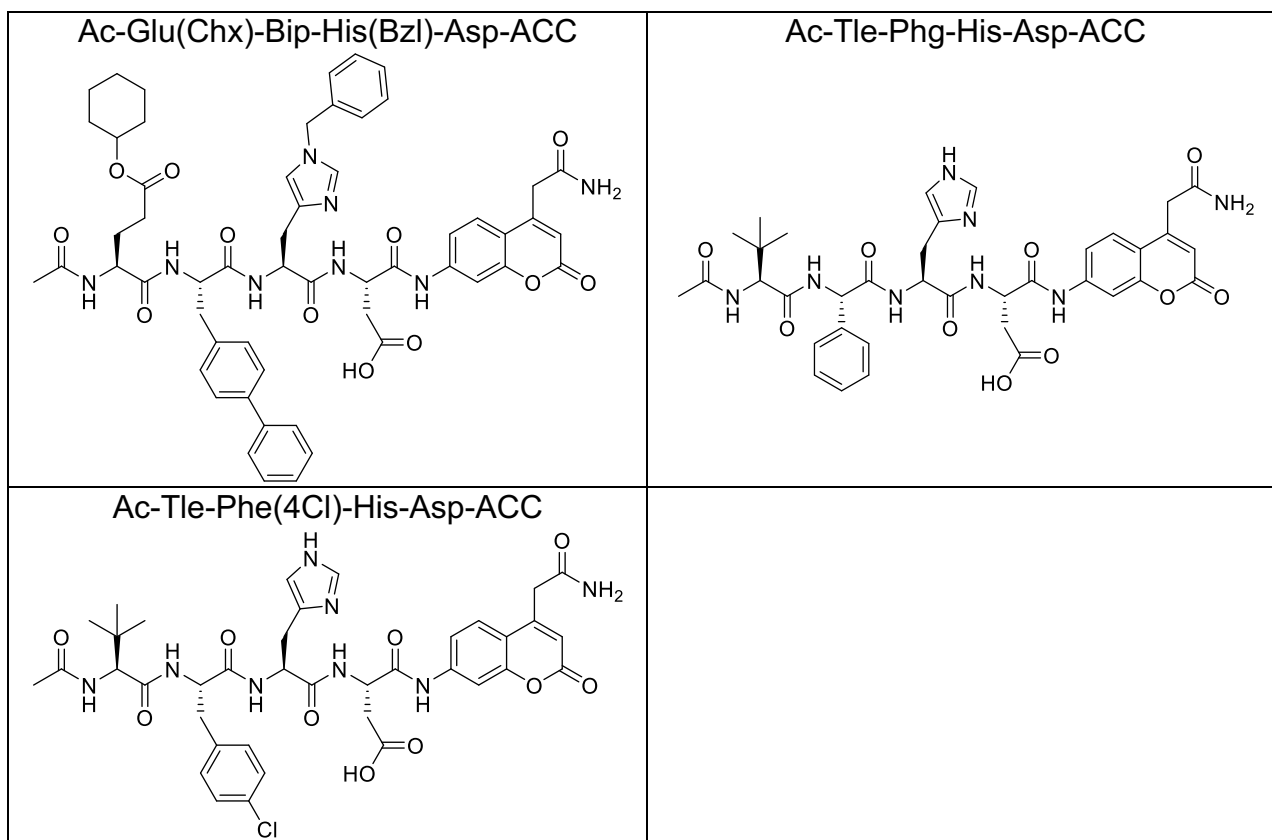

**Table S6 Structures of ACC-substrates with natural and unnatural amino acids.**
